# Supplementary material
Source: publisher figshare collection journal article supplement (https://tandf.figshare.com/articles/dataset/_/11931552)
Supplement: Supplementary file 1 [file 1]

**Supplementary Table 2.** Examples of common food items purchased.

| <b>Food Category</b>                                                                                                                                                                                                                                                                                                                                                                                                       | <b>Commonly Purchased Folate-poor Food Items*</b>                                                                                                                                                                                                                                                                  | <b>Commonly Purchased Folate-rich Food Items*</b>                                                                                                                                                   | <b>Commonly Eaten GF Food Items in Children with CD</b>                                                                                                                                                        |
|----------------------------------------------------------------------------------------------------------------------------------------------------------------------------------------------------------------------------------------------------------------------------------------------------------------------------------------------------------------------------------------------------------------------------|--------------------------------------------------------------------------------------------------------------------------------------------------------------------------------------------------------------------------------------------------------------------------------------------------------------------|-----------------------------------------------------------------------------------------------------------------------------------------------------------------------------------------------------|----------------------------------------------------------------------------------------------------------------------------------------------------------------------------------------------------------------|
| Vegetables                                                                                                                                                                                                                                                                                                                                                                                                                 | Carrots, Cucumber, Tomatoes                                                                                                                                                                                                                                                                                        | Broccoli, Romaine lettuce, Kale, Spinach                                                                                                                                                            | Cucumber, Carrot, Tomatoes, Bell peppers                                                                                                                                                                       |
| Fruit                                                                                                                                                                                                                                                                                                                                                                                                                      | Apple, Banana, Blueberry, Grape                                                                                                                                                                                                                                                                                    | Avocado                                                                                                                                                                                             | Banana, Apples, Grapes                                                                                                                                                                                         |
| Fruit/Vegetable Juice                                                                                                                                                                                                                                                                                                                                                                                                      | Apple juice                                                                                                                                                                                                                                                                                                        | n/a                                                                                                                                                                                                 | Orange juice, Apple juice                                                                                                                                                                                      |
| Eggs                                                                                                                                                                                                                                                                                                                                                                                                                       | n/a                                                                                                                                                                                                                                                                                                                | Fresh eggs                                                                                                                                                                                          | Fresh eggs                                                                                                                                                                                                     |
| Animal Protein                                                                                                                                                                                                                                                                                                                                                                                                             | Ground beef, Fresh chicken                                                                                                                                                                                                                                                                                         | Pulled pork, Hot dogs/sausages                                                                                                                                                                      | Fresh chicken, Fresh beef, Deli meat                                                                                                                                                                           |
| Legumes                                                                                                                                                                                                                                                                                                                                                                                                                    | Canned baked beans                                                                                                                                                                                                                                                                                                 | Chickpeas, Black beans                                                                                                                                                                              | Black beans, Kidney beans, Chickpeas                                                                                                                                                                           |
| Other Plant Based Protein                                                                                                                                                                                                                                                                                                                                                                                                  | Tofu                                                                                                                                                                                                                                                                                                               | Peanuts, Sunflower seeds, Flax seeds, Hummus, Peanut Butter                                                                                                                                         | Almonds, Chia and flax seeds, Peanut butter                                                                                                                                                                    |
| Dairy Products                                                                                                                                                                                                                                                                                                                                                                                                             | 1-2% Milk, Greek yogurt, Mozzarella                                                                                                                                                                                                                                                                                | Brie cheese                                                                                                                                                                                         | 1-2% milk, 2% MF yogurt, Cheddar cheese, Marble cheese                                                                                                                                                         |
| Gluten: Bread/Buns/Bagels                                                                                                                                                                                                                                                                                                                                                                                                  | n/a                                                                                                                                                                                                                                                                                                                | Folate fortified white bread/buns/bagels                                                                                                                                                            | n/a                                                                                                                                                                                                            |
| GF: Bread/Buns/Bagels                                                                                                                                                                                                                                                                                                                                                                                                      | Non-fortified GF white bread/buns/bagels                                                                                                                                                                                                                                                                           | Folate fortified GF white bread/buns/bagels                                                                                                                                                         | GF Bread                                                                                                                                                                                                       |
| Gluten: Other Grain Based Foods                                                                                                                                                                                                                                                                                                                                                                                            | n/a                                                                                                                                                                                                                                                                                                                | Wheat based cereal, Wheat based pasta                                                                                                                                                               | n/a                                                                                                                                                                                                            |
| GF: Other Grain Based Foods                                                                                                                                                                                                                                                                                                                                                                                                | Rice noodles, White rice, GF penne/fusilli, GF flour blends, Corn tortilla shells                                                                                                                                                                                                                                  | Quinoa, Folate fortified GF cereal                                                                                                                                                                  | White Rice, Rolled Oats, Rice flour, Folate fortified GF cereals                                                                                                                                               |
| Other Processed Foods <sup>a</sup>                                                                                                                                                                                                                                                                                                                                                                                         | Bottled water, Soda (including. diet), Orange flavoured juice drink, Canned soup (chicken soup, beef broth, etc...), Frozen hash browns, Chocolate, Ice cream, Gummy candies, Tortilla chips, Popcorn, Salad dressing, Pasta sauce, Cooking oil, Sugar, Salt, GF cookies, GF crackers and muffins, GF Granola bars | Gluten frozen pizza (cheese/pepperoni), Gluten boxed macaroni and cheese, Wheat based crackers, Potato chips, Wheat based cookies, Guacamole, Dry yeast, Onion powder, GF bean flour based crackers | Water, Frozen french fries, Chocolate, Ice cream/frozen Yogurt, Tortilla chips, Popcorn, Rice cakes/crackers, Butter, Ketchup, Honey, Canola oil, Salt, Sugar, GF multigrain crackers, GF cookies, GF pretzels |
| CD=Celiac disease; GF=Gluten-free; n/a=Not applicable; MF=Milk fat. *Folate-rich is defined as $\geq 60\mu\text{g}$ folate-dietary folate equivalent (DFE)/100g, equivalent to 15% of the Daily Value. Folate-poor is $\leq 20\mu\text{g}$ folate-DFE /100g, equivalent to 5% of the Daily Value (Health Canada 2016; Government of Canada 2019). <sup>a</sup> Category includes both GF and gluten containing food items. |                                                                                                                                                                                                                                                                                                                    |                                                                                                                                                                                                     |                                                                                                                                                                                                                |
