# Supplementary material
Source: publisher figshare collection journal article supplement (https://tandf.figshare.com/articles/dataset/_/11931552)
Supplement: Supplementary file 3 [file 1]

**Supplementary Table 1.** Classification categories based on household food purchases.

| <b>Food Category</b>                                                                                                                                                                                                    | <b>Examples</b>                                                     |
|-------------------------------------------------------------------------------------------------------------------------------------------------------------------------------------------------------------------------|---------------------------------------------------------------------|
| Fruits & Vegetables <sup>b</sup>                                                                                                                                                                                        | Fresh/Dried/Frozen fruits and vegetables, Juice                     |
| Grain Products <sup>a</sup>                                                                                                                                                                                             | Breads, Pasta, Cereals, Bakery products                             |
| Whole Grains <sup>b</sup>                                                                                                                                                                                               | Rice, Corn, Quinoa, Buckwheat                                       |
| Whole Grains <sup>c</sup>                                                                                                                                                                                               | Wheat, Barley, Rye                                                  |
| Milk <sup>a</sup>                                                                                                                                                                                                       | Cow's milk, Milk alternatives (soy, almond), Cheese, Yogurt         |
| Nuts <sup>a</sup>                                                                                                                                                                                                       | Almonds, Walnuts, Cashews, Seeds, Flax, Sunflower seeds             |
| Meat Products <sup>a</sup>                                                                                                                                                                                              | Beef, Pork, Chicken, Fish, Eggs, Deli meat, Canned meats/fish       |
| Unprepared Meals <sup>a</sup>                                                                                                                                                                                           | Canned soups, Dry soup mix, Boxed pasta (mac and cheese)            |
| Prepared Meals <sup>a</sup>                                                                                                                                                                                             | Ready-to-eat meals, Frozen meals                                    |
| Restaurant Meals <sup>a</sup>                                                                                                                                                                                           | Fast food, Family restaurants, Fine dining, Catering                |
| Snacks <sup>a</sup>                                                                                                                                                                                                     | Cookies, Chips, Chocolate, Ice cream                                |
| Baking & Cooking Ingredients <sup>a</sup>                                                                                                                                                                               | Spices & seasonings, Honey, Cooking oil, Salt, Sugar, Baker's yeast |
| Condiments and Sauces <sup>a</sup>                                                                                                                                                                                      | Butter, Peanut butter, Salsa, Tomato sauce, Ketchup, Mayo           |
| Beverages <sup>a</sup>                                                                                                                                                                                                  | Tea, Coffee, Soft drinks, Alcohol, Bottled water                    |
| Unidentifiable Food Items                                                                                                                                                                                               | General grocery, General produce, Open food entries on receipts     |
| Non food items                                                                                                                                                                                                          | Kitchen items, Books, Clothing, Coupons                             |
| GF=Gluten-free. <sup>a</sup> Examples account for food items that are both GF and gluten containing. <sup>b</sup> Examples are based on GF food items. <sup>c</sup> Examples are based on gluten containing food items. |                                                                     |
