# Supplementary material
Source: publisher figshare collection journal article supplement (https://tandf.figshare.com/articles/dataset/_/11931552)

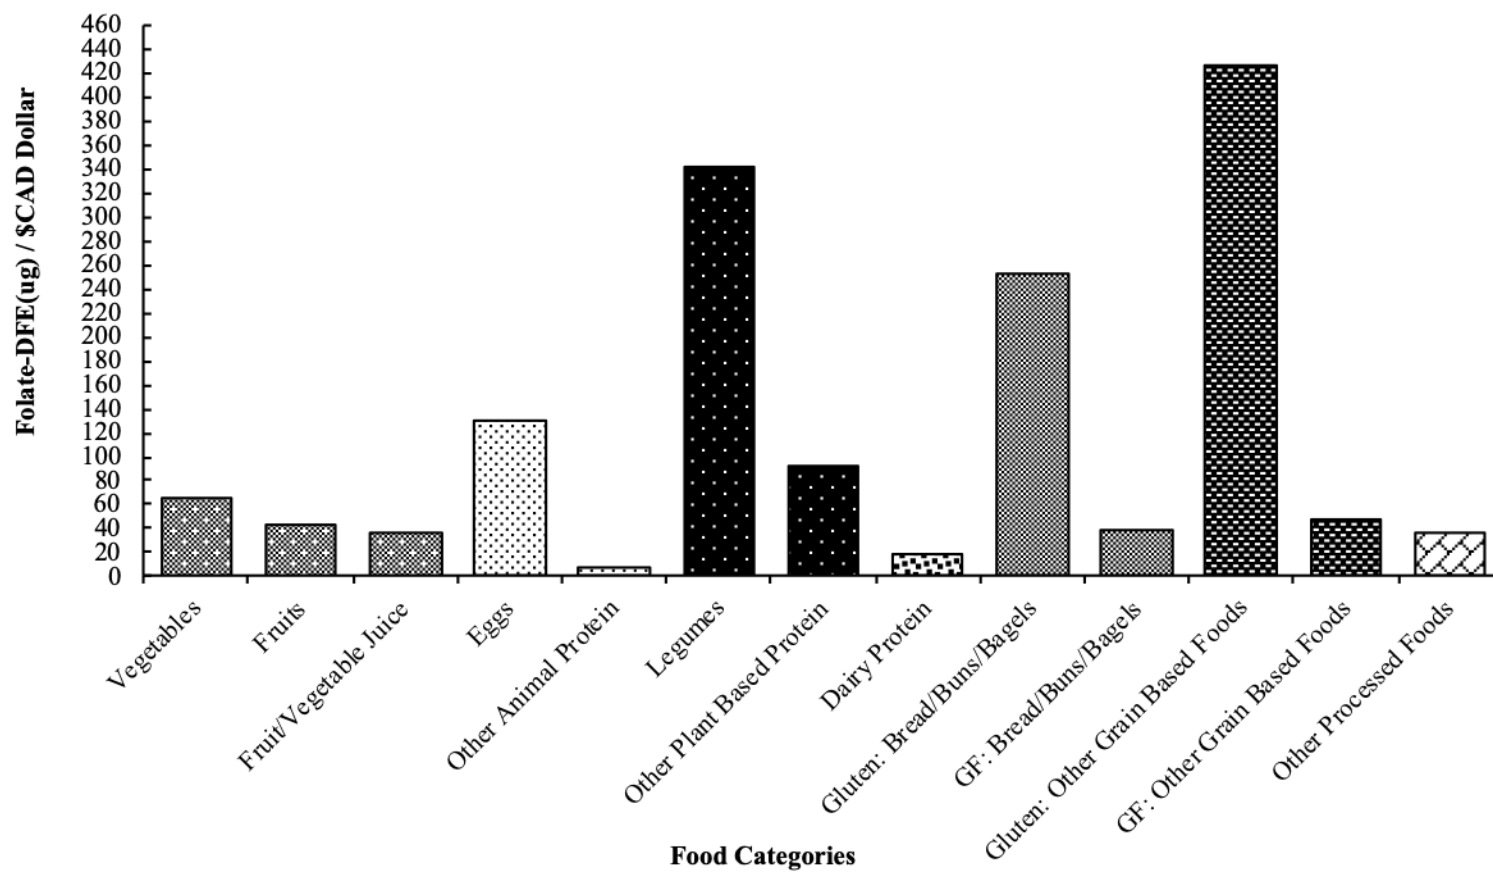

**Supplementary Figure 1.**

Supplement: Supplementary file 2 [file 1]
